1 Frontoparietal, cerebellum network codes for accurate intention  
2 prediction in altered perceptual conditions

3

4 Ceravolo<sup>1\*†</sup>, L., Schaerlaeken<sup>1\*</sup>, S., Frühholz<sup>2,3</sup>, S., Glowinski<sup>1§</sup>, D., & Grandjean<sup>1§</sup>, D.

5

6 <sup>1</sup> Neuroscience of Emotion and Affective Dynamics Lab, Department of Psychology and  
7 Educational Sciences and Swiss Center for Affective Sciences, University of Geneva, Geneva,  
8 Switzerland

9 <sup>2</sup> Department of Psychology, University of Zurich, Zurich, Switzerland

10 <sup>3</sup> Department of Psychology, University of Oslo, Oslo, Norway

11

12 \* Equal contribution as first authors

13 § Equal contribution as senior authors

14

15 † Corresponding author:

16 Leonardo Ceravolo, PhD

17 Neuroscience of Emotion and Affective Dynamics laboratory

18 Faculté de Psychologie et des Sciences de l'Education, Université de Genève

19 40 bd du Pont-d'Arve, 1205 Geneva, Switzerland

20 Phone: +41 22 379 9273

21 Email: [leonardo.ceravolo@unige.ch](mailto:leonardo.ceravolo@unige.ch)

22 ORCID ID: <https://orcid.org/0000-0003-0638-3981>

23 **Abstract**

24 Integrating and predicting intentions and actions of others are crucial components of social  
25 interactions, but the behavioral and neural underpinnings of such mechanisms in altered perceptual  
26 conditions remain poorly understood. We demonstrated that expertise was necessary to  
27 successfully understand and evaluate communicative intent in spatially and temporally altered  
28 visual representations of music plays, recruiting frontoparietal regions and several sub-areas of the  
29 cerebellum. Functional connectivity between these brain areas revealed widespread organization,  
30 especially in the cerebellum. This network may be essential to assess communicative intent in  
31 ambiguous or complex visual scenes.

32

33

34 **Keywords:** communication; functional connectivity; intention; neuroimaging

35 Human ability to coordinate with others is a key evolutionary skill, allowing us to achieve tasks  
36 that could not be managed individually. Beyond vocal and semantic communication (Kotz and  
37 Schwartze 2010), such mechanism relies on fine-tuned non-verbal expressive behaviors that must  
38 be able to communicate one's intent reliably and efficiently. Intention therefore involves the whole  
39 body as a mean of communication, especially focusing on the upper body actions and movement  
40 dynamics (Andersen and Cui 2009). It requires both parties to share similar representations at  
41 different levels (e.g., common goal or intermediate steps to achieve a final goal), to predict shared  
42 outcomes and to integrate the predicted consequences of our own actions as well as others' (Sebanz  
43 and Knoblich 2009). Hence, it also requires to pay attention to one's own intentions and to be able  
44 to predict and anticipate movement generation (Lau, Rogers et al. 2004). However, the neural  
45 processes underlying such communication flow are not yet fully understood. Currently, the  
46 literature points at the use of an internal forward model that optimizes one's motor control by  
47 comparing the actual and predicted sensory consequence of movements (Wolpert, Doya et al.  
48 2003). By extension, such model might also be used to predict others' actions in a social interaction  
49 based on one's own action representations (Wolpert, Doya et al. 2003). Such abilities would be  
50 supported by several interacting brain networks that are active both during action generation and  
51 during observation of others' actions (Rizzolatti, Fadiga et al. 1996). The frontoparietal network  
52 including the inferior parietal lobule (IPL), have been associated with observation of individual  
53 movements (in both monkeys and humans), shared visual attention, and motor intention  
54 recognition (Rizzolatti and Sinigaglia 2010). Attention to one's own intentions and actions also  
55 recruited the frontoparietal network, especially the prefrontal cortex exhibiting a strong functional  
56 coupling with the premotor cortex (Lau, Rogers et al. 2004). The posterior parietal cortex, on the  
57 other hand, was repeatedly observed in situations pertaining to motor intention and imagery

58 (Jeannerod 1994), while the lateral parietal cortex, such as the intraparietal sulcus (IPS) and IPL,  
59 were linked more directly and precisely to attention and intention itself (Lau, Rogers et al. 2004,  
60 Desmurget and Sirigu 2012, Eskenazi, Rueschemeyer et al. 2015). While such simulation system  
61 has been previously described as a mirror neuron system in monkeys based on single cell  
62 recordings, this mirror neuron system is difficult to observe properly in humans. Recognition of  
63 intentions is notably impacted by contextual information and prior knowledge (Brass, Schmitt et  
64 al. 2007). It is subject to information availability and processing (full body vision vs. occluded  
65 vision), context richness (familiar vs. novel context) or expertise in a given task (Rizzolatti and  
66 Sinigaglia 2010) and then related to general and specific predictive aspects. A few studies in  
67 humans have, in the past, highlighted the impact of expertise on prediction of movements in groups  
68 of experts, such as sport athletes (Aglioti, Cesari et al. 2008), showing their improved ability to  
69 anticipate the outcome of a specific action in others. In comparison to sport athletes, musicians  
70 possess expertise in both specific sensorimotor skills *and* social signal analyses and exhibit  
71 structural brain changes, especially in the temporal and premotor cortex, as a strong biological  
72 basis for their expertise and training (Münste, Altenmüller et al. 2002). Abovementioned studies  
73 did not specifically test the benefits of expertise onto the recognition of expressive intent in sub-  
74 optimal conditions (when information is lacking or altered), although it should be thoroughly  
75 studied. In fact, such line of research should critically contribute to the understanding of the  
76 behavioral and neural mechanisms underlying a better coordination between several individuals.  
77 In sub-optimal conditions, the cerebellum could be highly relied upon in order to predict accurately  
78 intention based on action understanding, planning, timing especially due to its fine-tuned  
79 connections with the basal ganglia and the cerebral cortex (Caligiore, Pezzulo et al. 2017). In fact,  
80 the cerebellum is part of the action observation (Sokolov, Gharabaghi et al. 2010) and voluntary

81 movement (Hülsmann, Erb et al. 2003) networks and it is also a strong hub for timing and rhythm  
82 processing (Molinari, Leggio et al. 2007, Chen, Penhune et al. 2008). Cerebellar activity is also  
83 enhanced during sensorimotor coordination in musicians (Krause, Schnitzler et al. 2010) and  
84 widely recruited by abstract social cognition, with involved sub-regions overlapping with  
85 sensorimotor cerebellar territories (Van Overwalle, Baetens et al. 2014, Sokolov 2018). The  
86 probability of the involvement of the cerebellum in sub-optimal action and intention decoding is  
87 therefore very high.

88 To shed light on the mechanisms of communicative intent, we recruited musicians and matched  
89 control participants who evaluated the visual dynamics of short pieces of violin solos with the  
90 violinist represented as a point-light display (PLD) following motion capture recordings on an  
91 independent group of expert violinists. Communicative intent was materialized by categorizing  
92 Piano vs. Forte intentional gestures in these short musical pieces while undergoing continuous  
93 brain scans using functional magnetic resonance imaging (fMRI). These short PLD video were  
94 manipulated to include both original (unmodified, but only with visual information) and modified  
95 PLD segments: these modified segments included 1) a condition with spatially randomized initial  
96 positions of points (namely, the “Spatial shuffling” condition) and 2) a condition in which pieces  
97 were cropped to keep only the first instants of the segments (namely, the “Temporal cropping”  
98 condition). We then compared the performance of musicians and controls over the accurate  
99 recognition of the expressive play on both normal and altered versions of the segments during  
100 fMRI. We hypothesized a clear and consistent performance advantage of expert musicians over  
101 control participants in assessing communicative intent (Piano vs. Forte). Regarding neuroimaging  
102 data, we hypothesized enhanced activity in the frontoparietal network and the cerebellum as a  
103 function of expertise that could be modulated by interindividual differences. Finally, we predicted

104 a stronger coupling between the prefrontal and premotor cortex as well as between the cerebellum  
105 and the frontoparietal network for experts, i.e. musicians.

106

## 107 **Material and Methods**

### 108 *Participants*

109 Thirty-seven right-handed participants took part in this study but final sample size was 35 (25  
110 females, 19 experts, 17 female musicians, M age =  $27 \pm 7$  years). In fact, two participants fell  
111 asleep repeatedly during data acquisition and were therefore excluded from the final sample.  
112 Participants were composed of a group of expert violinists who received at least an 8-yearlong  
113 training at the high musical institution (Geneva School of Music) and a control group of non-  
114 musicians. While the number of males and females differed significantly between the two groups  
115 ( $\chi^2(1, N=35) = 4.83, p = 0.027$ ) with more woman violinists than male, age did not differ between  
116 the two groups ( $t(30.26, N = 35) = -0.38, p = 0.7$ ). However, the variance induced by the sex did  
117 not seem to impact our models (Supplementary Table 1 & 2). All participants were naive to the  
118 experimental procedure and material and had no known history of psychiatric or neurological  
119 incidents. Finally, all participants reported normal hearing abilities and normal or corrected-to-  
120 normal vision (contact lenses or MRI-compatible plastic glasses). This study was conducted in  
121 compliance with the protocol, the current version of the Declaration of Helsinki, the ICH-GCP or  
122 ISO EN 14155 (as far as applicable) as well as all legal and regulatory requirements of the State-  
123 wise Ethics Committee of the University Hospital of Geneva.

124 ***Experimental Stimuli: Communicative intent task***

125 The complete set of stimuli consisted of 64 videos. These stimuli were produced using the  
126 following procedure. First, we filmed using a motion capture system (Qualisys, time sampling) the  
127 first violinist of a professional string quartet during 16 rehearsals of the same musical piece, the  
128 Death and the Maiden by Schubert, chosen for it offers a wide variety of writing and expressive  
129 styles. For half of the rehearsals, the first violinist played alone, for the remaining half, he played  
130 with the other string quartet members. During filming, the musicians were instructed to play  
131 expressively as if they were giving a concert performance. The recording sessions took place over  
132 two days in a concert hall for it offers naturalistic conditions, which perfectly adapt to the  
133 musician's needs and expectations (e.g., quality of the acoustics). After filming, all clips were  
134 edited, and the motion capture data were preprocessed to eliminate spurious data through standard  
135 filtering process (despiking and smoothing using MATLAB (The Mathworks, Inc., Natick, MA,  
136 USA)) in order to produce cleaned point-light displays (PLD) of the performances. The next step  
137 was to select specific moments in each performance where the first violinist indicates his intent to  
138 the fellow musicians with two communicative intents: piano and forte. To do so, we defined,  
139 together with the musicians, these key moments in the music score and edited the corresponding  
140 16 short sequences (8 Piano, 8 Forte). Two experimental visual manipulations were then applied  
141 on each edited point-light sequence. The first manipulation consisted in segmenting the sequence  
142 in two parts: the first part referred to the preparation of the entry, just before the production of the  
143 Piano or Forte gesture; 1.2s), the second one referred to the whole sequence (i.e., movement  
144 preparation plus entry; 2.7s). We refer to these sequences as Temporally cropped vs. Temporally  
145 unmodified. In the temporally cropped sequences, we focused on attack sequence because  
146 musicians think that it is crucial to understand the musicians' specific capacity to coordinate with

147 one another. The second manipulation consisted in destroying the anthropomorphic shape of the  
148 stimuli through a single spatial scrambling process, which keeps the dynamics of each point but  
149 shuffles their relative relationships with others. The final shape, which keeps the same kinetic  
150 energy as the original, does not related to any anthropomorphic shape. We refer to these sequences  
151 as Spatially shuffled vs. Spatially unmodified. They were designed to highlight musicians' higher  
152 processing of dynamic visual information when visual bodily anthropomorphic references are  
153 missing.

154 The final excerpts presented to the participants were a combination of all three conditions in a  
155 pseudorandom order: the communicative intent, the temporal cropping, and the spatial shuffling.  
156 For example, an excerpt could be presenting a piano gesture, temporally cropped, but spatially  
157 unmodified while another one could be presenting a forte gesture, with temporal cropping and  
158 spatial shuffling. In all sequences, only visual information were used and the accompanying sound  
159 tracks were not presented (see an example of each condition in Fig.1).



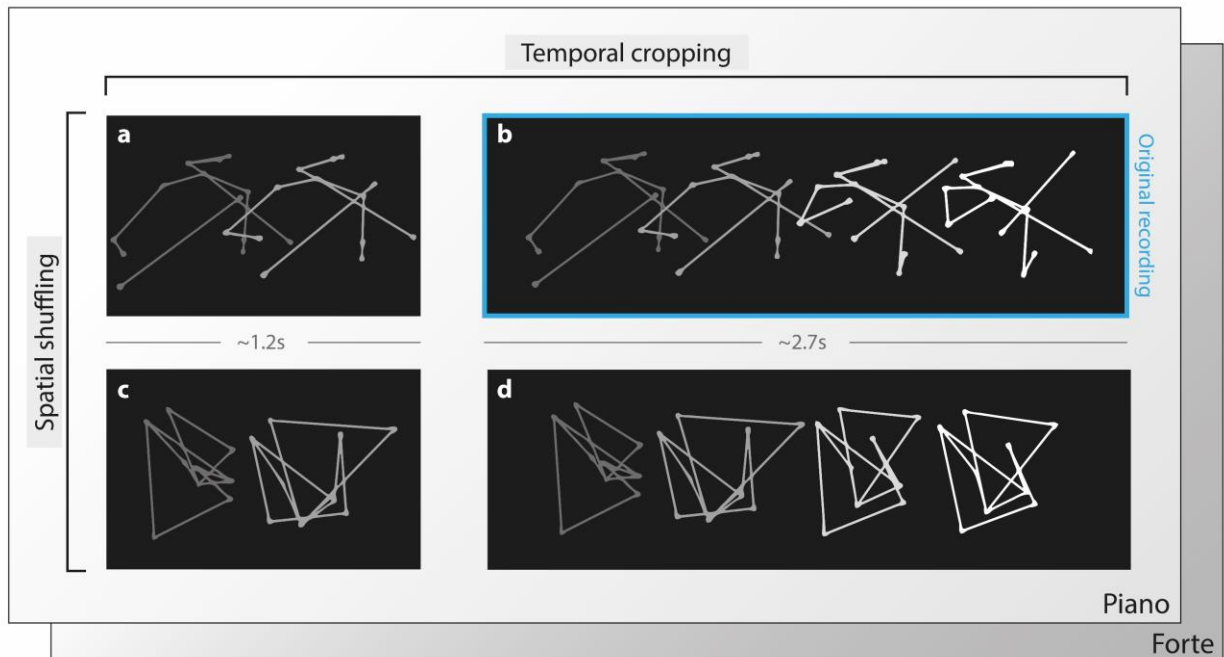

160

161 **Fig.1:** Overview of the stimuli displayed to the participant. The sequence of expressive movement  
162 is displayed through point-light display based on the collected motion capture of a string quartet  
163 first violinist. The two temporal segments used in the experiment respectively refer to the  
164 preparation (Temporally cropped condition, a) and the preparation plus the entry part (Temporally  
165 unmodified condition, b). For each of these temporal conditions, spatial shuffling was also applied  
166 as a separate condition (c, d, respectively). After watching the selected sequence, the participants  
167 were asked to indicate the perceived communicative intent of the music (forte or piano) by pressing  
168 a button.

169

### 170 ***Experimental procedure: Communicative intent task***

171 Participants, divided in two groups (musician vs control participants) were subjected to a 2  
172 (communicative intents: Piano vs. Forte) x 2 (temporal cropping: Temporally cropped vs.  
173 Temporally unmodified) x 2 (spatial shuffling: Spatially shuffled vs. Spatially unmodified) within-  
174 subject factorial design, resulting in eight experimental conditions (Fig.1). Before scanning,  
175 participants were introduced to and familiarized to the experimental task. This included performing  
176 two trials from each condition (these stimuli were excluded from the MRI task) while the

177 experimenter monitored performance. During the MRI session, participants watched the point-  
178 light display movies of the violinist movements. After each trial, participants had to report whether  
179 they thought whether the performance is related to a communicative intents: forte or piano. During  
180 debriefing, all participants reported complete comprehension of the experimental task. The  
181 experimental procedure relied on a two-alternative-forced-choice task. It aimed at revealing the  
182 difference in optimal decision strategies (Gold and Shadlen 2002, Ratcliff and McKoon 2008,  
183 Deneve 2012) developed by groups of musicians (task experts) versus control participants (non-  
184 experts).

### 185 ***Behavioral Data Analysis***

186 The statistical software R was used to analyze all behavioral data. We computed generalized linear  
187 mixed model (GLMM) to estimate the variance explained by the fixed factors Piano/Forte and  
188 Musician/Controls on the percentage of correct responses. GLMM takes advantage of the  
189 modelling of random effects to improve precision of the model and allow for the computation of  
190 models with non-normal distribution, here a binomial distribution. We test our predictions for the  
191 effect of different fixed effect factors including the expertise of the participant, the communicative  
192 intents, the spatial shuffling, and the temporal cropping. The random intercept effects encapsulated  
193 the variability related to each participant. We used a step-up strategy while building the model to  
194 test the different combinations of fixed effects. Based on the marginality principle, we present the  
195 highest order interaction effects (Nelder 1977), namely the interaction between the expertise and  
196 the other aforementioned experimental conditions. We used chi-square difference tests to  
197 investigate the contribution of each variable and their interaction. We report the effect sizes in  
198 accordance with the approach of Nakagawa and Schielzeth, implemented in the "MuMIn" R  
199 package (Nakagawa and Schielzeth 2013). They created an approach based on two indicators, a

200 marginal and a conditional R2 (respectively, R2m and R2c). R2m is the variance explained by the  
201 fixed factors, whereas R2c is the variance explained by the entire model (both fixed and random  
202 effects). These two indicators allows comparability with standard methods, while taking into  
203 account the variance explained by the random effects. We calculated and reported them for each  
204 statistical models.

### 205 *Neuro-imaging Image Acquisition*

206 Imaging data were acquired using a Siemens Trio 3.0 tesla MRI scanner at the Brain and  
207 Behavioral Laboratory (BBL) of the University Medical Center, University of Geneva (Geneva,  
208 Switzerland). For each participant and for the run of the experimental task we acquired 290  
209 functional T2\* -weighted echo planar image volumes (EPIs; slice thickness=3mm, gap=1mm, 36  
210 slices, TR=650ms, TE=30ms, flip angle = 90°, matrix=64·64, FOV=200mm). A T1-weighted,  
211 magnetization- prepared, rapid-acquisition, gradient echo anatomical scan (slice thickness=1mm,  
212 176 slices, TR=2530ms, TE=3.31ms, flip angle = 7°, matrix=256·256, FOV=256mm) was also  
213 acquired. Therefore, for each participant we acquired 290 volumes of 36 slices for a total of 10'440  
214 slices. The grand total for all participants was 10'150 volumes and 365'400 slices.

### 215 *Neuro-imaging Data Analysis*

216 Functional data were analyzed using Statistical Parametric Mapping version 12  
217 (<https://www.fil.ion.ucl.ac.uk/spm>) operating in MATLAB (The Mathworks, Inc., Natick, MA,  
218 USA). Preprocessing steps included realignment to the first volume of the time-series to correct  
219 for head motion; slice-timing; normalization to the Montreal Neurological Institute (MNI)  
220 template (resampled at 3 x 3 x 3 mm) and eventually spatial smoothing with an isotropic Gaussian  
221 kernel of 8 mm full width at half-maximum. A high-pass filter of 128s was used to remove low  
222 frequency components. Then, a general linear model (first-level analysis) was defined for each

223 participant separately (within-subject statistics). For the experimental task, correctly-evaluated  
224 trials were modeled by specific boxcar functions defined by the duration of the video stimuli  
225 spanning stimulus onset to offset and convolved with the canonical hemodynamic response  
226 function. Group-level statistics were then performed using a flexible factorial design to take into  
227 account the variance of all conditions and participants. Two different group-level models were  
228 computed for the present data: Model 1 included eight conditions (1. Spatially unmodified,  
229 Temporally unmodified, and Piano; 2. Spatially unmodified, Temporally unmodified, and Forte;  
230 3. Spatially unmodified, Temporally cropped, Piano; 4. Spatially unmodified, Temporally  
231 cropped, Forte; 5. Spatially shuffled, Temporally unmodified, Piano; 6. Spatially shuffled,  
232 Temporally unmodified, and Forte; 7. Spatially shuffled, Temporally cropped, and Piano; 8.  
233 Spatially shuffled, Temporally cropped, and Forte) and two groups (Musician; Control) with no  
234 covariates [Group X Conditions] while Model 2 included task performance as a group-level  
235 covariate of interest interacting with the Conditions factor [Performance X Conditions]. Both  
236 models additionally included a mandatory “participant factor” that allows inter-subject variability  
237 calculation. For both group-level models, specification of independence was set to true for the  
238 Participant and Group factors while it was set to false for the other factor conditions. Regarding  
239 variance estimation, it was set to unequal for all factors including Group, as homoscedasticity  
240 criteria can usually not be met with fMRI data (default setting in SPM12). For both models, group-  
241 level results were voxel-wise thresholded in SPM12 using corrected statistics with  $p < .05$  False  
242 Discovery Rate (FDR) and an arbitrary cluster extent threshold of  $k > 10$  voxels. For all analyses,  
243 regions with significant activation enhancement were labeled based on probabilistic  
244 cytoarchitectonic atlases (Automated Anatomical Labelling atlas (Tzourio-Mazoyer, Landeau et  
245 al. 2002), Cerebellum atlas (Diedrichsen, Balsters et al. 2009, Diedrichsen, Maderwald et al.

246 2011)) and rendered on semi-inflated brains of the CONN toolbox  
247 (<http://www.nitrc.org/projects/conn>), see Fig.2.

248 *Model 1: Conditions Training group-level statistics*

249 For this first model, regressors were created for each experimental condition and for each  
250 participant (N=35), leading to a first-level design matrix including 16 regressors in total among  
251 which 8 regressors of interest (Conditions, see above) and 8 regressors of no interest (Incorrect  
252 trials, the six motion parameters and the constant term). Each regressor of interest was used to  
253 compute main effect contrast vectors that were then taken to a second-level, group analysis using  
254 the flexible factorial design specification that we will detail here. Group-level analysis included  
255 the following factors: Conditions (see above) and Group. The Conditions factor was used to  
256 compare the musicians to the control participants regarding their ability to assess the  
257 communicative intent of the stimuli, whether spatially shuffled and/or temporally cropped. The  
258 following contrasts were hence computed using the above factorial architecture of the data: [piano  
259 > forte \* musicians > controls], [temporally cropped > temporally unmodified \*Musician>Control]  
260 and [spatially shuffled>spatially unmodified\*Musician>Control] (see Fig.2).

261 *Model 2: Conditions Training group-level statistics with task performance as second-level*  
262 *covariate*

263 The second model used the exact same settings and factorial structure as Model 1 in addition to a  
264 group-level covariate taking into account task performance for each participant (percentage of hits  
265 during the experimental task). This covariate was set to interact with the Conditions factor.  
266 Therefore, Model 2 included the following factorial structure: Conditions\*Task performance. This  
267 model was used to constrain our statistical results and observe the way some brain regions may be  
268 sensitive to task performance in Musicians as opposed to Non-musicians participants for the

269 following contrasts : [piano > forte \* performance], [temporally cropped > temporally unmodified  
270 \* performance] and [spatially shuffled > spatially unmodified \* performance]. Results from this  
271 second model were overlaid in green-to-blue in Fig.2.

## 272 *Functional connectivity analyses*

273 Functional connectivity analyses were carried out using the CONN toolbox v18.a (Whitfield-  
274 Gabrieli and Nieto-Castanon 2012). Spurious sources of noise were estimated and removed using  
275 the automated toolbox preprocessing algorithm, and the residual BOLD time-series was band-pass  
276 filtered using a low frequency window ( $0.008 < f < 0.09$  Hz). Correlation maps were then created  
277 for each condition of interest by taking the residual BOLD time-course for each condition from  
278 atlas ROIs and computing bivariate Pearson's correlation coefficients between the time courses of  
279 each voxel of each region of the atlas. These correlations were then converted to normally  
280 distributed values using Fisher's transform. Finally, group-level analyses were performed on these  
281 Fisher-transformed correlation maps to assess for main effects within-groups and significant  
282 connectivity differences between groups for contrasts of interest. Type I error was controlled by  
283 the use of seed-level false discovery rate (FDR) correction with  $p < .05$  to correct for multiple  
284 comparisons.

285

## 286 **Results**

### 287 *Behavior*

288 Behavioral results highlighted a generalized and reliable advantage of musicians over control  
289 participants for accurately evaluating piece dynamics as expressing either Piano or Forte  
290 communicative intentions in a discriminative task (Fig.2). We tested how the interaction effects of

291 our factors (Group [Musicians>Controls] and Conditions [Forte>Piano, Temporally  
 292 cropped>Temporally unmodified, Spatially shuffled>Spatially unmodified]) explained a larger  
 293 part of variance for each statistical model compared to models with only the main effects (all  
 294  $p<.001$ , complete statistics in Supplementary Table 2). More specifically, for each model  
 295 computed, we observed that when information is altered (Temporally cropped, Spatially shuffled;  
 296 Fig.2**b,c**) or subtler (Piano, Fig.2**a**), the performance of all our participants drops significantly (all  
 297  $p<.001$ , complete statistics in Supplementary Table 2 & 3). At the group level, musicians  
 298 outperformed control participants in assessing communicative intents regardless of the condition  
 299 presented (Fig.2**a-c**, all  $p<.001$ ). Finally, we describe a significant interaction effect between group  
 300 and conditions for each model (all  $p<.001$ ). No sex differences were observed (Supplementary  
 301 Figure 1, Supplementary Table 1).

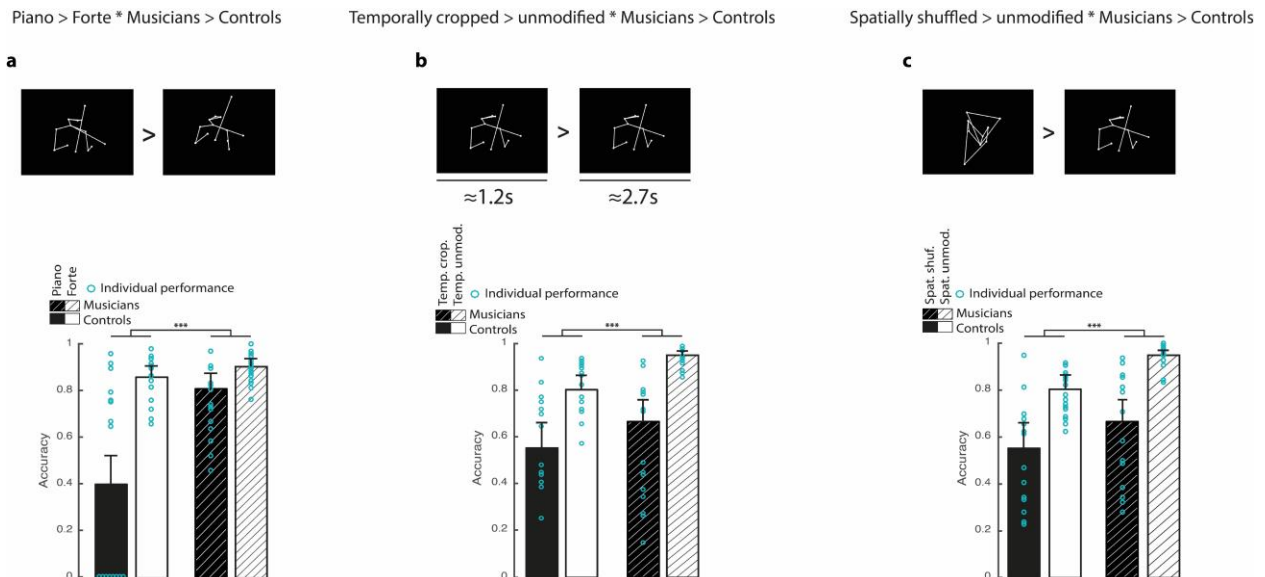

302

303 **Fig.2:** Experimental stimuli and behavioral results for the impact of expertise on intention  
 304 evaluation. **(a)** Example of piano vs. forte Point Light Display (PLD) and averaged performance  
 305 and individual points per group for piano vs. forte piece dynamics. **(b)** Example of temporally  
 306 cropped vs. temporally unmodified PLD and averaged performance and individual points per  
 307 group for piano vs. forte piece dynamics in temporally cropped vs. temporally unmodified

308 sequences. (c) Example of spatially shuffled vs. spatially unmodified PLD and averaged  
309 performance and individual points per group for piano vs. forte piece dynamics in spatially  
310 shuffled vs. spatially unmodified sequences. Error bars represent 95% confidence interval. [\*\*\*:  
311  $p < .001$ , \*\*:  $p < .01$ , \*:  $p < .05$ ; :  $p < 0.1$ ; Spat.: spatial, Temp.: temporal, shuf.: shuffling, crop.:  
312 cropping, unmodif.: unmodified]

313

## 314 *Neuroimaging*

### 315 *Wholebrain data*

316 Neuroimaging results focused on the regions with enhanced activations for musicians as compared  
317 to control participants, for communicative intent, temporal cropping and spatial shuffling  
318 conditions compared to complete excerpts. Analyses focused exclusively on trials in which  
319 participants correctly identified the intention depicted in the PLD . When focusing on the excerpts  
320 expressing a piano nuance (Piano>Forte\*Musician>Control), we observed enhanced activations  
321 in the pre supplementary area (preSMA) (MNI coordinates in Supplementary Table 4 & 5) and  
322 left dorsolateral prefrontal cortex (DLPFC) (Fig.3a,j, Supplementary Table 4 & 5, Supplementary  
323 Figure 2 & 3). When focusing on the temporally cropped excerpts (Temporally  
324 cropped>Temporally unmodified\*Musician>Control), we observed enhanced activations in the  
325 left IPL, cerebellum lobules V, VI, VIIb, and VIII, the bilateral posterior middle temporal gyrus  
326 (MTG), and the inferior frontal gyrus (IFG) (Fig.3b,c,f,g,k,l; Supplementary Table 4 & 5,  
327 Supplementary Figure 2 & 3). Finally, when we focused on the spatially shuffled excerpts  
328 (Spatially shuffled>Spatially unmodified\*Musician>Control), we observed enhanced activations  
329 in the bilateral intraparietal sulcus (IPS), right preSMA, and bilateral DLPFC extending to the IFG  
330 pars opercularis and triangularis, cerebellum (Vermis areas IV,V, Crus II, lobules I-IV, V, VI,  
331 VIIb, VIIa, VIIIb, X), and bilateral insula (Fig.3d,e,h,i,m,n; Supplementary Table 4 & 5,  
332 Supplementary Figure 2 & 3). To further emphasize these enhanced activations in perspective with



333 the global individual performance of each participant, we also computed another second-level  
334 analysis with individual performances of the participants as group-level covariate. Consequently,  
335 we could account for brain regions with enhanced activations in relation to general performance  
336 (group-level analysis) for our contrasts of interest. These results crucially include inter-individual  
337 variability regarding task performance, across groups (continuous, one average value per  
338 participant). Rendered in green-to-blue activations (Fig.3**b-e,f-i,k-n**; Supplementary Table 4 & 5,  
339 Supplementary Figure 2), global individual performance analysis revealed a strong overlap with  
340 abovementioned brain regions for the temporally cropped condition, especially in the IPL, SMA,  
341 and in the cerebellum (Temporally cropped>Temporally unmodified\*Musician>Control with  
342 Individual Performance, Fig.3**b,c,f,g,k,l**; Supplementary Table 4 & 5, Supplementary Figure 2).  
343 This result suggests that this network is highly relied on for accurately evaluating the  
344 communicative intent of temporally cropped PLD as a function of both performance and expertise  
345 and is sensitive to individual differences of performance as well. Such overlap between analyses  
346 was smaller for the spatially shuffled excerpts (Spatially shuffled>Spatially  
347 unmodified\*Musician>Control with Individual Performance), especially in the cerebellum. In fact,  
348 results show that portions of the bilateral insula, bilateral preSMA, bilateral DLPFC as well as the  
349 right IPS did overlap, emphasizing the strong role of these regions in both performance and  
350 expertise. Interestingly, the left IPS showed a much smaller overlap between analyses compared  
351 to the right IPS, suggesting an interhemispheric dissociation (Fig.3**d,e,h,i,m,n**) with left IPS  
352 activity enhanced massively for correctly evaluated piece dynamics as opposed to the right IPS  
353 being modulated by the interindividual differences of performance. Such overlap between analyses  
354 was also observed bilaterally for cerebellum area VIIb (Fig.3**m**). Additional brainstem activity was  
355 observed in the right corticospinal tract (Fig.3**n**).

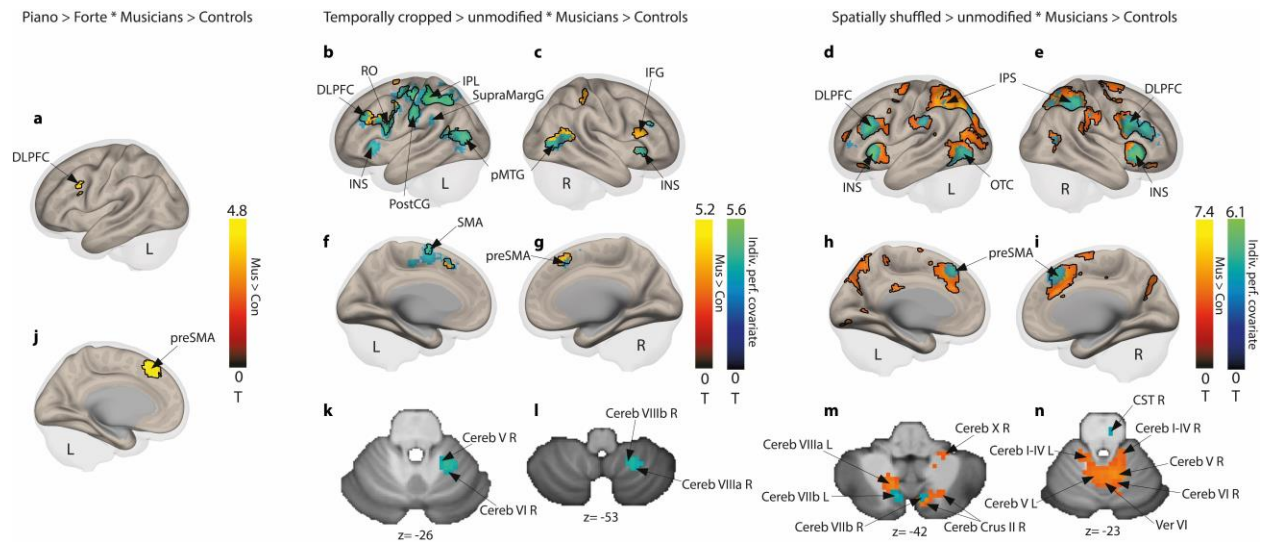

356

357 **Fig.3:** Neural evidence of communicative intent decoding by musicians and matched controls. (a,j)  
 358 Enhanced activity in preSMA and DLPFC for piano vs. forte sequences for musicians vs. control  
 359 participants. (b,c,f,g) Enhanced activity for temporally cropped vs. temporally unmodified  
 360 sequences for musicians vs. control participants in red-to-yellow in IPL, and with overall task  
 361 performance as group-level covariate in blue-to-green in IPL, DLPFC, pMTG, preMSA. and in  
 362 subregions of the cerebellum (k,l). (d,e,h,i) Enhanced activity for spatially shuffled vs. spatially  
 363 unmodified sequences for musicians vs. control participants in red-to-yellow in IPS, preSMA,  
 364 DLPFC, and INS, and with overall task performance as group-level covariate in blue-to-green in  
 365 IPS, preSMA, DLPFC, INS, and OTC and in the cerebellum (m,n). The color bars represent the  
 366 statistical T values of the contrast. Black outlines delineate regions of the contrasts without the  
 367 performance covariate. [Cereb: cerebellum lobule; Cereb Crus: cerebellum crus of ansiform  
 368 lobule; CST: corticospinal tract of the brainstem; DLPFC: dorso lateral prefrontal cortex; IFG:  
 369 inferior frontal gyrus; INS: insula; IPL: inferior parietal lobule; IPS: inferior parietal sulcus;  
 370 lingual gyrus; OTC: occipito-temporal cortex; pMTG: medial temporal gyrus; posterior  
 371 part; preSMA: pre supplementary motor area; PostCG: postcentral gyrus; RO: Rolandic  
 372 operculum; SupraMargG: supra marginal gyrus; Ver: vermis; L: left; R:right]. Voxel-wise  $p < .05$   
 373 FDR corrected.

374

375 *Functional connectivity data*

376 Additionally, atlas-based seed-to-seed functional connectivity (FC) analyses were performed to  
377 highlight the existence of widespread coupled brain activity targeting frontoparietal and cerebellar  
378 regions and related to both communicative intent processing and expertise. These analyses  
379 revealed the involvement of numerous regions observed in our wholebrain contrasts of interest in  
380 addition to subcortical and cerebellar connectivity (Fig.4). A general effect of expertise across  
381 conditions (Musician>Control, main effect of all conditions) revealed a functional coupling  
382 between the left IPL and the left post central gyrus (Supplementary Figure 4). Concerning our  
383 contrasts of interest, communicative intent and expertise interacted  
384 (Piano>Forte\*Musician>Control) and lead to both coupled and anti-coupled functional networks  
385 (Fig.4a; Supplementary Table 6). Specifically, we observed coupled FC between the bilateral  
386 MTG, left putamen, bilateral fusiform cortex, brainstem, and several subregions within the  
387 cerebellum, such as cerebellar lobules III, VIII and X of the left hemisphere. Anti-coupled FC was  
388 observed between the medial frontal cortex, posterior cingulate gyrus, frontal pole, left DLPFC,  
389 and left IPS (see details in Fig.4a; Supplementary Table 6). For temporally cropped excerpts  
390 (Temporally cropped>Temporally unmodified\*Musician>Control), only coupled FC was  
391 observed. More specifically, analyses showed widespread fronto-parieto-cerebellar FC in the  
392 bilateral inferior frontal gyrus pars opercularis (IFGop), left DLPFC, left superior parietal lobule  
393 (SPL), right IPS and vermis areas VII and VIII (see details in Fig.4b; Supplementary Table 6).  
394 The last contrast of interest involving visually shuffled PLD (Spatially shuffled>Spatially  
395 unmodified\*Musician>Control) highlighted coupled FC between the anterior part of the left  
396 inferior, middle and superior temporal gyri (aITG, aMTG and aSTG, respectively), left posterior  
397 MTG and right supramarginal gyrus while anti-coupled FC characterized connectivity between the

398 left IFGop, right posterior ITG, posterior cingulate gyrus and brainstem (see details in Fig.4c;  
 399 Supplementary Table 6).

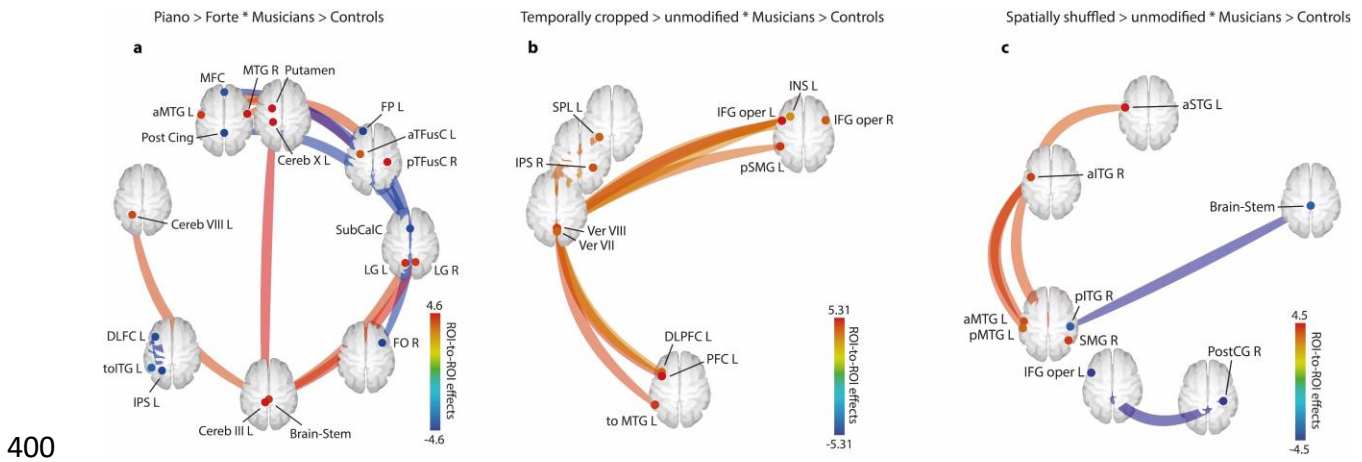

400  
 401 **Fig.4:** Functional connectivity of communicative intent decoding by musicians and matched  
 402 controls. **(a)** Enhanced connectivity for piano vs. forte excerpts for musicians vs. control  
 403 participants. **(b)** Enhanced connectivity for temporally cropped vs. unmodified sequences for  
 404 musicians vs. control participants. **(c)** Enhanced connectivity for spatially shuffled vs. unmodified  
 405 sequences for musicians vs. control participants [aITG: inferior temporal gyrus, anterior  
 406 part; aMTG: medial temporal gyrus, anterior part; aSTG: superior temporal gyrus, anterior  
 407 part; aTFus: temporal fusiform, anterior part; Cereb: cerebellum lobule; DLPFC: dorso lateral  
 408 prefrontal cortex; FO: frontal operculum; FP: frontal pole; IFG oper: inferior frontal gyrus  
 409 operculum; INS: insula; IPL: inferior parietal lobule; IPS: inferior parietal sulcus; LG: lingual  
 410 gyrus; MFC: medial frontal cortex; MTG: medial temporal gyrus; PFC: prefrontal cortex; pITG:  
 411 inferior temporal gyrus, posterior part; pMTG: medial temporal gyrus, posterior part; Post Cing:  
 412 posterior cingulate; PostCG: posterior central gyrus; pSMG: superior medial gyrus, posterior  
 413 part; pTFusC: temporal fusiform cortex, posterior part; R: right; SMG: superior medial  
 414 gyrus; SPL: superior parietal lobule; SubCalC: subcallosal cortex; toITG: inferior temporal gyrus  
 415 temporo-occipital part; toMTG: medial temporal gyrus, temporo-occipital part; Ver:  
 416 vermis]. Seed-level  $p < .05$  FDR corrected.

417

418

## 419 **Discussion**

420 The present study aimed at a clearer understanding of the interaction between expertise and  
421 communicative intent evaluation as a potential proxy for social interactions and coordination.  
422 Using point-light displays of violinists as stimuli, we asked experts and non-experts, namely  
423 musicians and controls, to evaluate the expressive intent of the plays. Expressive intent could  
424 materialize as *piano* or *forte* and either be visually or temporally unmodified or shuffled and  
425 cropped, respectively. Our results demonstrate that musicians consistently outperformed control  
426 participants, be it for unmodified or altered stimuli. Pre-motor and lateral parietal areas together  
427 with dorsolateral prefrontal cortex played a major role in giving a strong hand to experts in addition  
428 to numerous cerebellar regions.

429 Behavioral results confirmed and further developed the role of expertise in the perception of  
430 others' intent. Musicians were more consistent and accurate in perceiving expressive gestures,  
431 indicating close links between perception and action abilities (Wöllner and Cañal-Bruland 2010).  
432 Importantly, such result remained true when information was lacking or altered, highlighting  
433 behavioral benefits of expertise in action understanding, integration, and prediction based on the  
434 short dynamics of the segments and even with altered anthropomorphic information. It stresses the  
435 importance for action processing and prediction of combining perceptual information about the  
436 observer's own and the others' goal-directed movements (Spunt and Lieberman 2012).

437 Our neuroimaging results revealed a widespread network of brain regions as a function of expertise  
438 when decoding or inferring communicative intent, especially in strongly altered perceptual  
439 conditions. The advantage of experts for understanding and assessing communicative intent  
440 recruited the DLPFC, associated with observation of actions (Rizzolatti and Sinigaglia 2010) and  
441 influenced by training and expertise (Moore, Cohen et al. 2006) as well as the preSMA, involved

442 most notably in internally and externally selected actions (Mueller, Brass et al. 2007). Therefore,  
443 preSMA and DLPFC seem sufficient to accurately internalize action and extract communicative  
444 intent, respectively, in expert participants. These regions would also explain the ability of  
445 musicians to integrate the temporal structure of rhythm mediated by working memory (Chen,  
446 Penhune et al. 2008). Functional connectivity analyses also revealed that expert participants relied  
447 on both coupled and anti-coupled networks to successfully infer communicative intent. The  
448 coupled networks include areas involved in intention probability (putamen; Zapparoli, Seghezzi et  
449 al. 2018) as well as in movement prediction and motor imagery (cerebellum; Sokolov, Miall et al.  
450 2017) and timing encoding (brainstem and cerebellum; Rao, Mayer et al. 2001, Molinari, Leggio  
451 et al. 2007). More specifically, a large region of the cerebellum including lobule VIII (and VIIIa)  
452 was shown to covary with instrumental expertise, especially for temporal complexity (Chen,  
453 Penhune et al. 2008). This result raises the question of whether general or instrument-specific  
454 abilities of musicians directly influence cerebellum activity, such important distinction should be  
455 addressed in future studies. In a lesion study, lobule III—as well as lobules I, IV and V—was also  
456 involved in action observation (Sokolov, Gharabaghi et al. 2010) while lobule IX and to a smaller  
457 extent lobule X were repeatedly linked to verbal working memory (Van Overwalle, Baetens et al.  
458 2014). As a functionally connected cerebellar network and through connections with the brainstem  
459 and basal ganglia, these lobules therefore give strong weight to the cerebellum as a crucial  
460 contributing player in action observation, processing, and prediction. On the other hand, anti-  
461 coupled activity recruited brain regions known for mental states attributed to moving shapes and  
462 memory for intentions (Medial prefrontal cortex and frontal pole, respectively; Blakemore and  
463 Decety 2001), action observation (DLPFC: Rizzolatti and Sinigaglia 2010), and biological motion

464 perception (ITG; Blakemore and Decety 2001), as well as attention to intention and its  
465 understanding (IPS; Blakemore and Decety 2001).

466 Behavioral advantage of communicative intent assessment in altered perceptual conditions by  
467 expert participants relied essentially on several of the abovementioned brain areas with some  
468 additions. In temporally cropped sequences, expertise further recruited positively connected  
469 regions involved in interoception and motor intention awareness (insula; Craig and Craig 2009),  
470 intentional action production (IFGop; Zapparoli, Seghezzi et al. 2018), intention understanding  
471 (IPS and IPL; Blakemore and Decety 2001) and temporal processing linked to actions (vermis,  
472 especially areas VIII and VIIIa; Rao, Mayer et al. 2001). Communicative intent understanding as  
473 a function of expertise in spatially shuffled PLD recruited very similar brain areas when compared  
474 to temporal cropping at the wholebrain level, but with larger clusters. This result could be  
475 explained by an advantage in assessing complex visual inputs in musicians as compared to non-  
476 musicians to evaluate instrumental performance (Griffiths and Reay 2018). Moreover, general task  
477 performance as group-level covariate constrained our wholebrain results and showed a difference  
478 between left and right IPS, with the latter showing a larger cluster of enhanced activity as a function  
479 of task performance in experts vs. controls. This suggests a specific role of the right IPS region  
480 related to inter-individual differences in performances and this region was indeed reported to  
481 contribute to interpersonal synchronization related to action (Bhat, Hoffman et al. 2017).

482 Additionally, functional connectivity analyses revealed coupled temporal cortices (anterior STG,  
483 MTG, ITG; posterior MTG, ITG) and anti-coupled connectivity in the IFGop, brainstem and  
484 posterior cingulate cortex. The coupled networks revealed processing of biological motion  
485 independent of motor information (superior and middle temporal cortices; Rizzolatti and  
486 Sinigaglia 2010) and attribution of intentions to spatially shuffled stimuli (posterior STG; Lee,

487 Gao et al. 2012), regions interestingly known for their feedforward connections to the IPS and IPL  
488 (Rizzolatti and Sinigaglia 2010). Anti-coupled functional connectivity stressed again intentional  
489 action production and respectively unusual action intention processing (IFGop; Zapparoli,  
490 Seghezzi et al. 2018) and movement initiation and control (brainstem (Nandi, Aziz et al. 2002)  
491 and cerebellum (Rao, Mayer et al. 2001)).

492 While our data shed new light on intention encoding and decoding and further highlight behavioral  
493 contexts favorable to expert participants over non-experts, some limitations should be taken into  
494 account. First, sample size could have been larger, although it was difficult to recruit several  
495 additional musicians who would fit our inclusion criteria. Second, past studies emphasized  
496 structural brain differences between musicians and non-musicians (Gaser and Schlaug 2003) and  
497 therefore we could constrain our results even more had we acquired diffusion tensor images, for  
498 instance. Third, our stimuli included point-light displays of violinists only, therefore restricting  
499 our conclusions regarding other types of expert musicians. Finally, other ways of altering the  
500 stimuli, such as modifying rhythmicity or adding sublevels of visual shuffling, could have been  
501 employed to further specify the impact of expertise on more fine-grained perceptual alterations  
502 and their impact on communicative intent decoding.

503 Taking our behavioral and neuroimaging data as well as study limitations into consideration, our  
504 results reveal the strong role of expertise in understanding and predicting action and  
505 communicative intentions. Such assertion is especially true in altered perceptual conditions,  
506 namely with visually or temporally altering of stimuli, and this advantage of musicians over non-  
507 musicians would rely on regions of the frontoparietal network in addition to several areas of the  
508 cerebellum, basal ganglia and brainstem. Such neural systems might be at play in numerous other



509 conditions in everyday social interactions as humans are experts in predicting others when they  
510 interact with them daily.

511

## 512 **Acknowledgement**

513 This study was supported by a Swiss National Science Foundation project funding (51NF40-  
514 104897 – DG). The EU ICT SIEMPRE project acknowledges the financial support of the Future  
515 and Emerging Technologies (FET) programme within the Seventh Framework Programme for  
516 Research of the European Commission, under FET-Open grant number 250026-2. We thank Bruno  
517 Bonet at the Brain and Behavior Laboratory of the Geneva University Hospital Medical Center for  
518 his assistance during data acquisition. Finally, we would like to extend our acknowledgements to  
519 musicians from the Quartetto di Cremona for the recording of the stimuli, and the contribution of  
520 violinist experts Chiara Noera and Florence Malgoire for their precious suggestions.

521

## 522 **Data availability statement**

523 The datasets generated during and/or analyzed during the current study are available from the  
524 corresponding author on request.

525

## 526 **Code availability statement**

527 The codes used to analyze the data of the current study are available from the corresponding author  
528 on request.

529

530 **References**

- 531 Aglioti, S. M., P. Cesari, M. Romani and C. Urgesi (2008). "Action anticipation and motor  
532 resonance in elite basketball players." Nature neuroscience **11**(9): 1109-1116.
- 533 Andersen, R. A. and H. Cui (2009). "Intention, action planning, and decision making in parietal-  
534 frontal circuits." Neuron **63**(5): 568-583.
- 535 Bhat, A. N., M. D. Hoffman, S. L. Trost, M. L. Culotta, J. Eilbott, D. Tsuzuki and K. A. Pelphrey  
536 (2017). "Cortical activation during action observation, action execution, and interpersonal  
537 synchrony in adults: a functional near-infrared spectroscopy (fNIRS) study." Frontiers in human  
538 neuroscience **11**: 431.
- 539 Blakemore, S.-J. and J. Decety (2001). "From the perception of action to the understanding of  
540 intention." Nature reviews. Neuroscience **2**(8): 561.
- 541 Brass, M., R. M. Schmitt, S. Spengler and G. Gergely (2007). "Investigating action understanding:  
542 inferential processes versus action simulation." Current Biology **17**(24): 2117-2121.
- 543 Caligiore, D., G. Pezzulo, G. Baldassarre, A. C. Bostan, P. L. Strick, K. Doya, R. C. Helmich, M.  
544 Dirks, J. Houk and H. Jörntell (2017). "Consensus paper: towards a systems-level view of  
545 cerebellar function: the interplay between cerebellum, basal ganglia, and cortex." The Cerebellum  
546 **16**(1): 203-229.
- 547 Chen, J. L., V. B. Penhune and R. J. Zatorre (2008). "Moving on time: brain network for auditory-  
548 motor synchronization is modulated by rhythm complexity and musical training." Journal of  
549 cognitive neuroscience **20**(2): 226-239.
- 550 Craig, A. D. and A. Craig (2009). "How do you feel--now? The anterior insula and human  
551 awareness." Nature reviews neuroscience **10**(1).

- 552 Deneve, S. (2012). "Making decisions with unknown sensory reliability." Frontiers in  
553 neuroscience **6**: 75.
- 554 Desmurget, M. and A. Sirigu (2012). "Conscious motor intention emerges in the inferior parietal  
555 lobule." Current opinion in neurobiology **22**(6): 1004-1011.
- 556 Diedrichsen, J., J. H. Balsters, J. Flavell, E. Cussans and N. Ramnani (2009). "A probabilistic MR  
557 atlas of the human cerebellum." Neuroimage **46**(1): 39-46.
- 558 Diedrichsen, J., S. Maderwald, M. Küper, M. Thürling, K. Rabe, E. Gizewski, M. E. Ladd and D.  
559 Timmann (2011). "Imaging the deep cerebellar nuclei: a probabilistic atlas and normalization  
560 procedure." Neuroimage **54**(3): 1786-1794.
- 561 Eskenazi, T., S.-A. Rueschemeyer, F. P. de Lange, G. Knoblich and N. Sebanz (2015). "Neural  
562 correlates of observing joint actions with shared intentions." Cortex **70**: 90-100.
- 563 Gaser, C. and G. Schlaug (2003). "Brain structures differ between musicians and non-musicians."  
564 Journal of Neuroscience **23**(27): 9240-9245.
- 565 Gold, J. I. and M. N. Shadlen (2002). "Banburismus and the brain: decoding the relationship  
566 between sensory stimuli, decisions, and reward." Neuron **36**(2): 299-308.
- 567 Griffiths, N. and J. Reay (2018). "The Relative Importance of Aural and Visual Information in the  
568 Evaluation by Musicians and Non-Musicians of Classical Music Performance." Music Perception:  
569 364-375.
- 570 Hülsmann, E., M. Erb and W. Grodd (2003). "From will to action: sequential cerebellar  
571 contributions to voluntary movement." Neuroimage **20**(3): 1485-1492.
- 572 Jeannerod, M. (1994). "The representing brain: Neural correlates of motor intention and imagery."  
573 Behavioral and Brain sciences **17**(2): 187-202.

574 Kotz, S. A. and M. Schwartz (2010). "Cortical speech processing unplugged: a timely subcortico-  
575 cortical framework." Trends in cognitive sciences **14**(9): 392-399.

576 Krause, V., A. Schnitzler and B. Pollok (2010). "Functional network interactions during  
577 sensorimotor synchronization in musicians and non-musicians." Neuroimage **52**(1): 245-251.

578 Lau, H. C., R. D. Rogers, P. Haggard and R. E. Passingham (2004). "Attention to intention."  
579 science **303**(5661): 1208-1210.

580 Lee, S. M., T. Gao and G. McCarthy (2012). "Attributing intentions to random motion engages the  
581 posterior superior temporal sulcus." Social cognitive and affective neuroscience **9**(1): 81-87.

582 Molinari, M., M. G. Leggio and M. H. Thaut (2007). "The cerebellum and neural networks for  
583 rhythmic sensorimotor synchronization in the human brain." The Cerebellum **6**(1): 18-23.

584 Moore, C. D., M. X. Cohen and C. Ranganath (2006). "Neural mechanisms of expert skills in  
585 visual working memory." Journal of Neuroscience **26**(43): 11187-11196.

586 Mueller, V. A., M. Brass, F. Waszak and W. Prinz (2007). "The role of the preSMA and the rostral  
587 cingulate zone in internally selected actions." Neuroimage **37**(4): 1354-1361.

588 Münte, T. F., E. Altenmüller and L. Jäncke (2002). "The musician's brain as a model of  
589 neuroplasticity." Nature Reviews Neuroscience **3**(6): 473.

590 Nakagawa, S. and H. Schielzeth (2013). "A general and simple method for obtaining R<sup>2</sup> from  
591 generalized linear mixed-effects models." Methods in Ecology and Evolution **4**(2): 133-142.

592 Nandi, D., T. Z. Aziz, X. Liu and J. F. Stein (2002). "Brainstem motor loops in the control of  
593 movement." Movement disorders: official journal of the Movement Disorder Society **17**(S3): S22-  
594 S27.

595 Nelder, J. (1977). "A reformulation of linear models." Journal of the Royal Statistical Society:  
596 Series A (General) **140**(1): 48-63.

597 Rao, S. M., A. R. Mayer and D. L. Harrington (2001). "The evolution of brain activation during  
598 temporal processing." Nature neuroscience **4**(3): 317.

599 Ratcliff, R. and G. McKoon (2008). "The diffusion decision model: theory and data for two-choice  
600 decision tasks." Neural computation **20**(4): 873-922.

601 Rizzolatti, G., L. Fadiga, V. Gallese and L. Fogassi (1996). "Premotor cortex and the recognition  
602 of motor actions." Cognitive brain research **3**(2): 131-141.

603 Rizzolatti, G. and C. Sinigaglia (2010). "The functional role of the parieto-frontal mirror circuit:  
604 interpretations and misinterpretations." Nature reviews. Neuroscience **11**(4): 264.

605 Sebanz, N. and G. Knoblich (2009). "Prediction in joint action: What, when, and where." Topics  
606 in Cognitive Science **1**(2): 353-367.

607 Sokolov, A. A. (2018). "The cerebellum in social cognition." Frontiers in Cellular Neuroscience  
608 **12**: 145.

609 Sokolov, A. A., A. Gharabaghi, M. S. Tatagiba and M. Pavlova (2010). "Cerebellar engagement  
610 in an action observation network." Cerebral cortex **20**(2): 486-491.

611 Sokolov, A. A., R. C. Miall and R. B. Ivry (2017). "The cerebellum: adaptive prediction for  
612 movement and cognition." Trends in cognitive sciences **21**(5): 313-332.

613 Spunt, R. P. and M. D. Lieberman (2012). "Dissociating modality-specific and supramodal neural  
614 systems for action understanding." Journal of Neuroscience **32**(10): 3575-3583.

615 Tzourio-Mazoyer, N., B. Landeau, D. Papathanassiou, F. Crivello, O. Etard, N. Delcroix, B.  
616 Mazoyer and M. Joliot (2002). "Automated anatomical labeling of activations in SPM using a  
617 macroscopic anatomical parcellation of the MNI MRI single-subject brain." Neuroimage **15**(1):  
618 273-289.

619 Van Overwalle, F., K. Baetens, P. Mariën and M. Vandekerckhove (2014). "Social cognition and  
620 the cerebellum: a meta-analysis of over 350 fMRI studies." Neuroimage **86**: 554-572.

621 Whitfield-Gabrieli, S. and A. Nieto-Castanon (2012). "Conn: a functional connectivity toolbox for  
622 correlated and anticorrelated brain networks." Brain connectivity **2**(3): 125-141.

623 Wöllner, C. and R. Cañal-Bruland (2010). "Keeping an eye on the violinist: motor experts show  
624 superior timing consistency in a visual perception task." Psychological research **74**(6): 579-585.

625 Wolpert, D. M., K. Doya and M. Kawato (2003). "A unifying computational framework for motor  
626 control and social interaction." Philosophical Transactions of the Royal Society of London B:  
627 Biological Sciences **358**(1431): 593-602.

628 Zapparoli, L., S. Seghezzi, P. Scifo, A. Zerbi, G. Banfi, M. Tettamanti and E. Paulesu (2018).  
629 "Dissecting the neurofunctional bases of intentional action." Proceedings of the National Academy  
630 of Sciences **115**(28): 7440-7445.

631

632
